# Supplementary material for: LAIR-1 suppresses cell growth of ovarian cancer cell via the PI3K-AKT-mTOR pathway
Source: publisher site journal article supplement (doi:10.18632/aging.103589), 2020-07-04
Supplement: Supplementary file [file aging-v12i16-103589-supplementary-material-SD1.pdf]

## SUPPLEMENTARY FIGURE

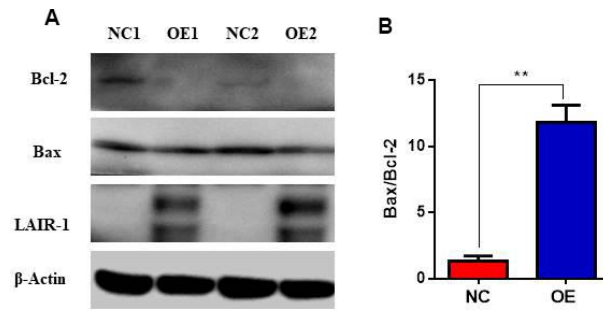

**Supplementary Figure 1. LAIR-1 promotes ovarian carcinoma cell apoptosis in vivo.** (A) Western blot analyses of Bcl-2, Bax, LAIR-1 in tumor tissues derived from control and LAIR-1 overexpression SKOV3 cells.  $\beta$ -Actin was used as a loading control.
